# Supplementary material for: Bud-Derivatives, a Novel Source of Polyphenols and How Different Extraction Processes Affect Their Composition
Source: MDPI journal article supplement (doi:10.3390/foods9101343), 2020-09-23
Supplement: s1 [file s1]

| Chemical classes | Compound         | Purity (%) |
|------------------|------------------|------------|
| Cinnamic acids   | Caffeic acid     | ≥98%       |
|                  | Chlorogenic acid | ≥95%       |
|                  | Coumaric acid    | ≥98%       |
|                  | Ferulic acid     | ≥99%       |
| Flavonols        | Hyperoside       | ≥97%       |
|                  | Isoquercitrin    | ≥98%       |
|                  | Quercetin        | ≥95%       |
|                  | Quercitrin       | ≥98%       |
|                  | Rutin            | ≥95%       |
| Benzoic acids    | Ellagic acid     | ≥95%       |
|                  | Gallic acid      | ≥97%       |
| Catechins        | Catechin         | ≥97%       |
|                  | Epicatechin      | ≥98%       |
