# Supplementary material for: Bud-Derivatives, a Novel Source of Polyphenols and How Different Extraction Processes Affect Their Composition
Source: Foods. 2020 Sep 23;9(10):1343. doi: 10.3390/foods9101343 (PMC7598208; doi:10.3390/foods9101343)
Supplement: Supplementary file 1 [file foods-09-01343-s001.zip › SUPPLEMENTARY MATERIALS/Table S2.xlsx]

## Sheet: m SD
	cinnamic acids								flavonols										benzoic acids				catechins
	caffeic acid		chlorogenic acid		coumaric acid		ferulic acid		hyperoside		isoquercitrin		quercetin		quercitrin		rutin		ellagic acid		gallic acid		catechin		epicatechin
	Mean value	SD	Mean value	SD	Mean value	SD	Mean value	SD	Mean value	SD	Mean value	SD	Mean value	SD	Mean value	SD	Mean value	SD	Mean value	SD	Mean value	SD	Mean value	SD	Mean value	SD
Sample	(mg/100 g FW)		(mg/100 g FW)		(mg/100 g FW)		(mg/100 g FW)		(mg/100 g FW)		(mg/100 g FW)		(mg/100 g FW)		(mg/100 g FW)		(mg/100 g FW)		(mg/100 g FW)		(mg/100 g FW)		(mg/100 g FW)		(mg/100 g FW)
Cb_M_A	n.d.	/	n.d.	/	47.037	0.825	n.d.	/	n.d.	/	n.d.	/	166.14	0.776	182.59	0.553	93.72	0.71	240.39	0.718	46.012	0.53	241.34	0.603	282.6	0.541
Cb_M_B	n.d.	/	n.d.	/	n.d.	/	n.d.	/	n.d.	/	n.d.	/	203.2	1.18	n.d.	/	n.d.	/	203.88	1.51	214.97	1.06	157.46	1.55	91.264	1.187
Cb_US_A	n.d.	/	n.d.	/	n.d.	/	n.d.	/	n.d.	/	n.d.	/	107.31	1.42	122.85	1.39	n.d.	/	80.565	1.041	n.d.	/	n.d.	/	297.57	1.07
Cb_US_B	n.d.	/	n.d.	/	n.d.	/	n.d.	/	n.d.	/	n.d.	/	172.82	3.06	26.16	2.85	n.d.	/	59.12	1.92	147.3	2.15	n.d.	/	227.6	3
Cm_M_A	n.d.	/	n.d.	/	n.d.	/	23.973	0.399	19.872	0.43	n.d.	/	620.61	0.476	406.14	0.526	8.416	0.449	577.48	0.372	n.d.	/	n.d.	/	104.7	0.532
Cm_M_B	n.d.	/	n.d.	/	n.d.	/	24.593	1.555	n.d.	/	n.d.	/	n.d.	/	277.32	1.21	33.677	0.877	179.84	1.24	361.5	1.12	638.45	1.1	523.2	1.41
Cm_US_A	n.d.	/	14.872	1.041	n.d.	/	n.d.	/	140.3	1.16	283.86	1.21	n.d.	/	n.d.	/	247.87	1.2	276.38	1.33	n.d.	/	n.d.	/	98.832	1.211
Cm_US_B	n.d.	/	n.d.	/	n.d.	/	n.d.	/	269.81	4.85	98.41	4.71	n.d.	/	n.d.	/	416.57	3.42	329.55	2.85	n.d.	/	n.d.	/	167.03	4.67
Fc_M_A	n.d.	/	n.d.	/	62.206	0.844	n.d.	/	63.672	0.938	n.d.	/	49.68	1.243	128.34	1.08	46.202	1.105	67.293	0.894	n.d.	/	75.791	1.037	191.56	1.13
Fc_M_B	n.d.	/	n.d.	/	n.d.	/	n.d.	/	67.933	1.069	n.d.	/	49.786	1.342	n.d.	/	5.566	1.264	45.863	1.079	n.d.	/	32.413	0.993	36.008	1.114
Fc_US_A	2.442	1.178	n.d.	/	4.052	1.448	n.d.	/	21.914	1.13	n.d.	/	31.431	1.253	28.996	0.853	34.335	1.079	26.332	1.176	n.d.	/	88.92	1.392	49.351	1.263
Fc_US_B	6.19	2.37	n.d.	/	4.58	3.18	n.d.	/	27.07	2.52	n.d.	/	54.56	3.1	42.28	3.16	31.1	2.67	52.18	3.49	n.d.	/	115.94	3.65	67.98	3.71
Fe_M_A	43.805	0.8	489.94	0.794	n.d.	/	295.28	0.683	242.26	0.892	n.d.	/	176.88	0.628	79.93	1.004	n.d.	/	214.49	0.693	n.d.	/	57.739	0.79	270.51	0.892
Fe_M_B	n.d.	/	n.d.	/	n.d.	/	119.44	0.977	12.458	1.332	4.561	0.825	n.d.	/	n.d.	/	206.59	1.28	40.81	1.246	n.d.	/	53.009	1.114	45.743	1.418
Fe_US_A	n.d.	/	69.545	1.379	81.457	0.94	n.d.	/	262.41	1.44	26.158	1.126	n.d.	/	63.914	1.056	26.445	1.033	115.82	0.925	n.d.	/	94.455	1.266	130.8	0.947
Fe_US_B	n.d.	/	43.88	3.61	69.65	3.09	n.d.	/	365.15	1.95	39.41	3.17	n.d.	/	82.66	2.79	63.86	2.24	77.4	2.3	n.d.	/	108.86	3.15	107.1	2.14
Ld_M_A	n.d.	/	n.d.	/	n.d.	/	n.d.	/	n.d.	/	n.d.	/	182.57	0.328	28.245	0.209	64.339	0.376	97.069	0.306	n.d.	/	56.007	0.321	56.082	0.346
Ld_M_B	n.d.	/	n.d.	/	n.d.	/	n.d.	/	n.d.	/	n.d.	/	77.326	1.161	n.d.	/	74.243	1.082	137.23	0.875	n.d.	/	47.836	1.458	23.066	1.18
Ld_US_A	2.401	1.02	n.d.	/	n.d.	/	n.d.	/	n.d.	/	n.d.	/	497.22	1.11	143.61	1.07	170.03	1.18	190.25	0.955	n.d.	/	71.195	0.723	80.924	1.4
Ld_US_B	n.d.	/	n.d.	/	n.d.	/	n.d.	/	n.d.	/	n.d.	/	496.63	3.83	228.01	4.94	216.99	4.5	219.28	3.66	n.d.	/	40.22	3.24	86.86	4.09
Pm_M_A	n.d.	/	n.d.	/	n.d.	/	n.d.	/	5.733	0.668	n.d.	/	25.396	0.783	n.d.	/	n.d.	/	n.d.	/	n.d.	/	136.26	1.06	35.114	0.6
Pm_M_B	n.d.	/	n.d.	/	n.d.	/	n.d.	/	n.d.	/	n.d.	/	n.d.	/	n.d.	/	n.d.	/	n.d.	/	n.d.	/	28.992	1.143	20.373	1.169
Pm_US_A	n.d.	/	n.d.	/	n.d.	/	n.d.	/	4.274	1.284	n.d.	/	20.809	1.376	6.28	1.204	n.d.	/	3.667	1.562	n.d.	/	315.12	1.18	63.778	1.386
Pm_US_B	n.d.	/	n.d.	/	n.d.	/	n.d.	/	4.6	2.32	n.d.	/	34.15	2.04	n.d.	/	n.d.	/	n.d.	/	n.d.	/	253.07	2.44	72.81	2.34
Qp_M_A	5.084	0.649	n.d.	/	n.d.	/	n.d.	/	7.28	0.81	n.d.	/	27.906	0.378	188.45	0.787	n.d.	/	231.56	0.649	52.027	0.635	94.831	0.393	199.92	0.459
Qp_M_B	n.d.	/	n.d.	/	n.d.	/	n.d.	/	5.798	1.504	n.d.	/	53.6	1.254	n.d.	/	n.d.	/	77.144	1.037	6.881	1.127	45.535	1.019	64.277	1.168
Qp_US_A	1.757	1.288	n.d.	/	n.d.	/	n.d.	/	3.128	1.488	n.d.	/	33.658	0.879	15.595	1.386	3.599	1.215	217.84	0.956	5.486	1.396	117.42	0.949	136.38	1.29
Qp_US_B	n.d.	/	n.d.	/	n.d.	/	n.d.	/	13.21	2.9	n.d.	/	51.93	2.99	6.94	2.61	n.d.	/	53.26	3.1	5.17	2.62	54.31	2.44	107.5	2.46
Tt_M_A	n.d.	/	n.d.	/	n.d.	/	5.296	0.726	9.023	0.686	4.072	0.561	36.153	0.636	2.393	0.789	n.d.	/	22.981	0.793	n.d.	/	12.342	0.91	39.826	0.553
Tt_M_B	n.d.	/	n.d.	/	n.d.	/	23.874	1.062	9.488	1.321	4.154	1.16	75.804	1.355	1.346	1.212	n.d.	/	6.62	1.042	n.d.	/	n.d.	/	50.679	1.031
Tt_US_A	n.d.	/	n.d.	/	n.d.	/	5.327	1.39	11.408	0.887	11.645	1.248	29.514	1.26	16.55	1.147	2.144	1.39	107.51	0.889	25.055	0.804	88.289	0.932	68.17	0.852
Tt_US_B	n.d.	/	n.d.	/	n.d.	/	12.43	5.2	12.35	4.03	6.71	2.67	62.19	3.93	18.99	4.22	n.d.	/	79.4	3.48	16.88	4.94	18.95	4.63	62.2	5.56
