# Supplementary figures and images for: Bud-Derivatives, a Novel Source of Polyphenols and How Different Extraction Processes Affect Their Composition
Source: MDPI journal article supplement (doi:10.3390/foods9101343), 2020-09-23

**Cinnamic acids - Flavonols**

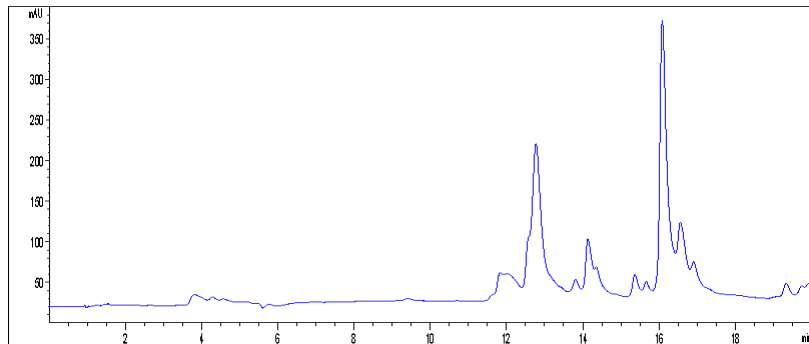

*Ld\_M\_A*

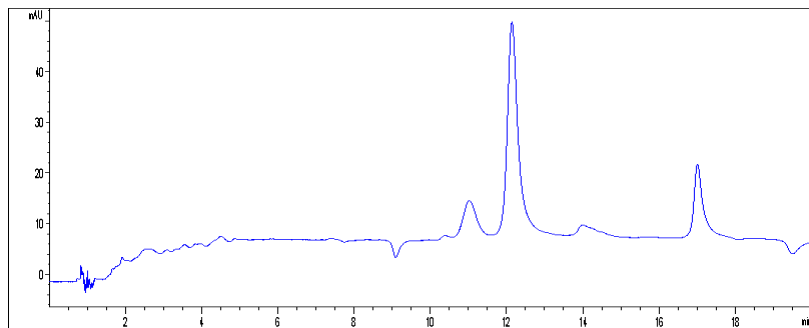

*Ld\_M\_B*

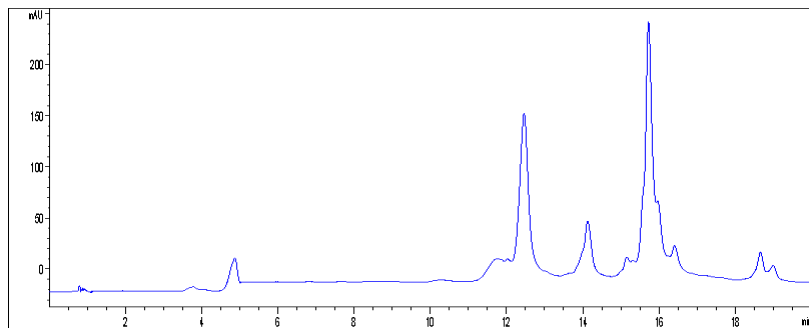

*Ld\_US\_A*

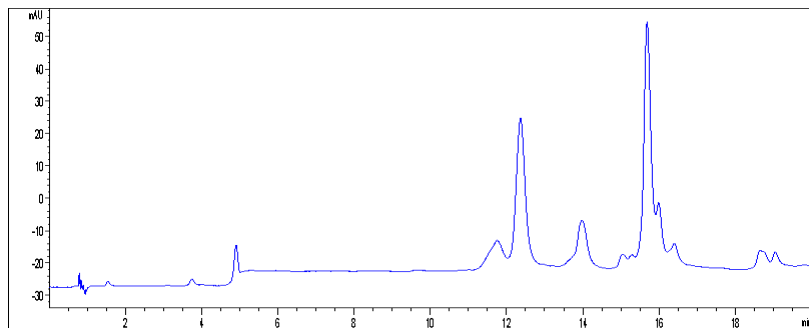

*Ld\_US\_B*

**Benzoic acids - Catechins**

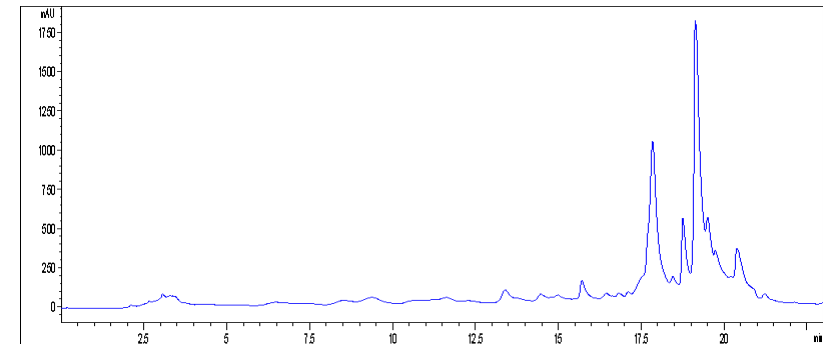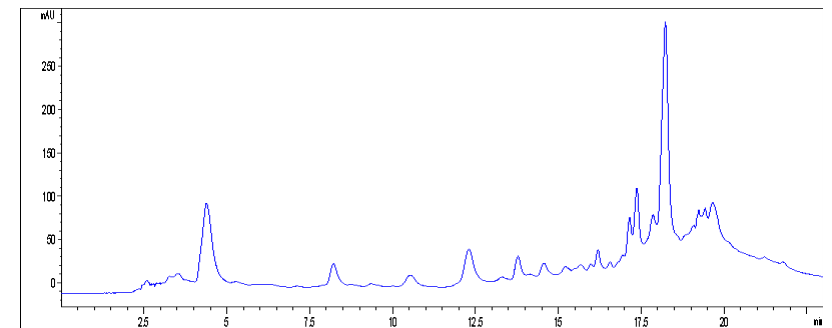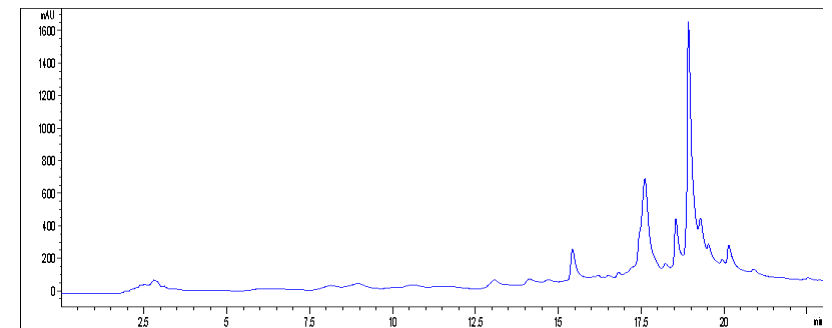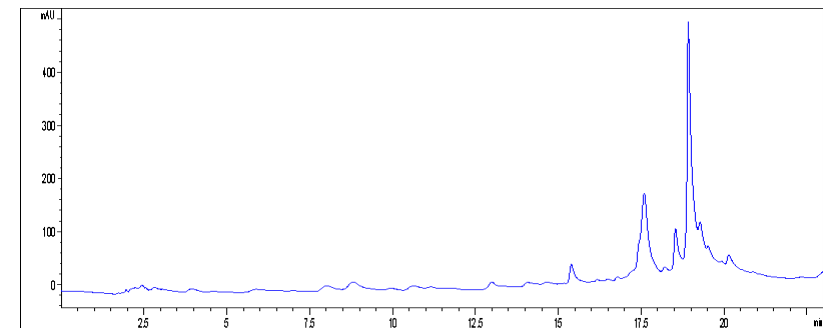

Supplement: s1 [file s1]
